# Supplementary material for: Central nervous system involvement in childhood acute lymphoblastic leukemia is linked to upregulation of cholesterol biosynthetic pathways
Source: PubMed Central journal article supplement (PMC9712090; doi:10.1038/s41375-022-01722-x), 2022-10-26

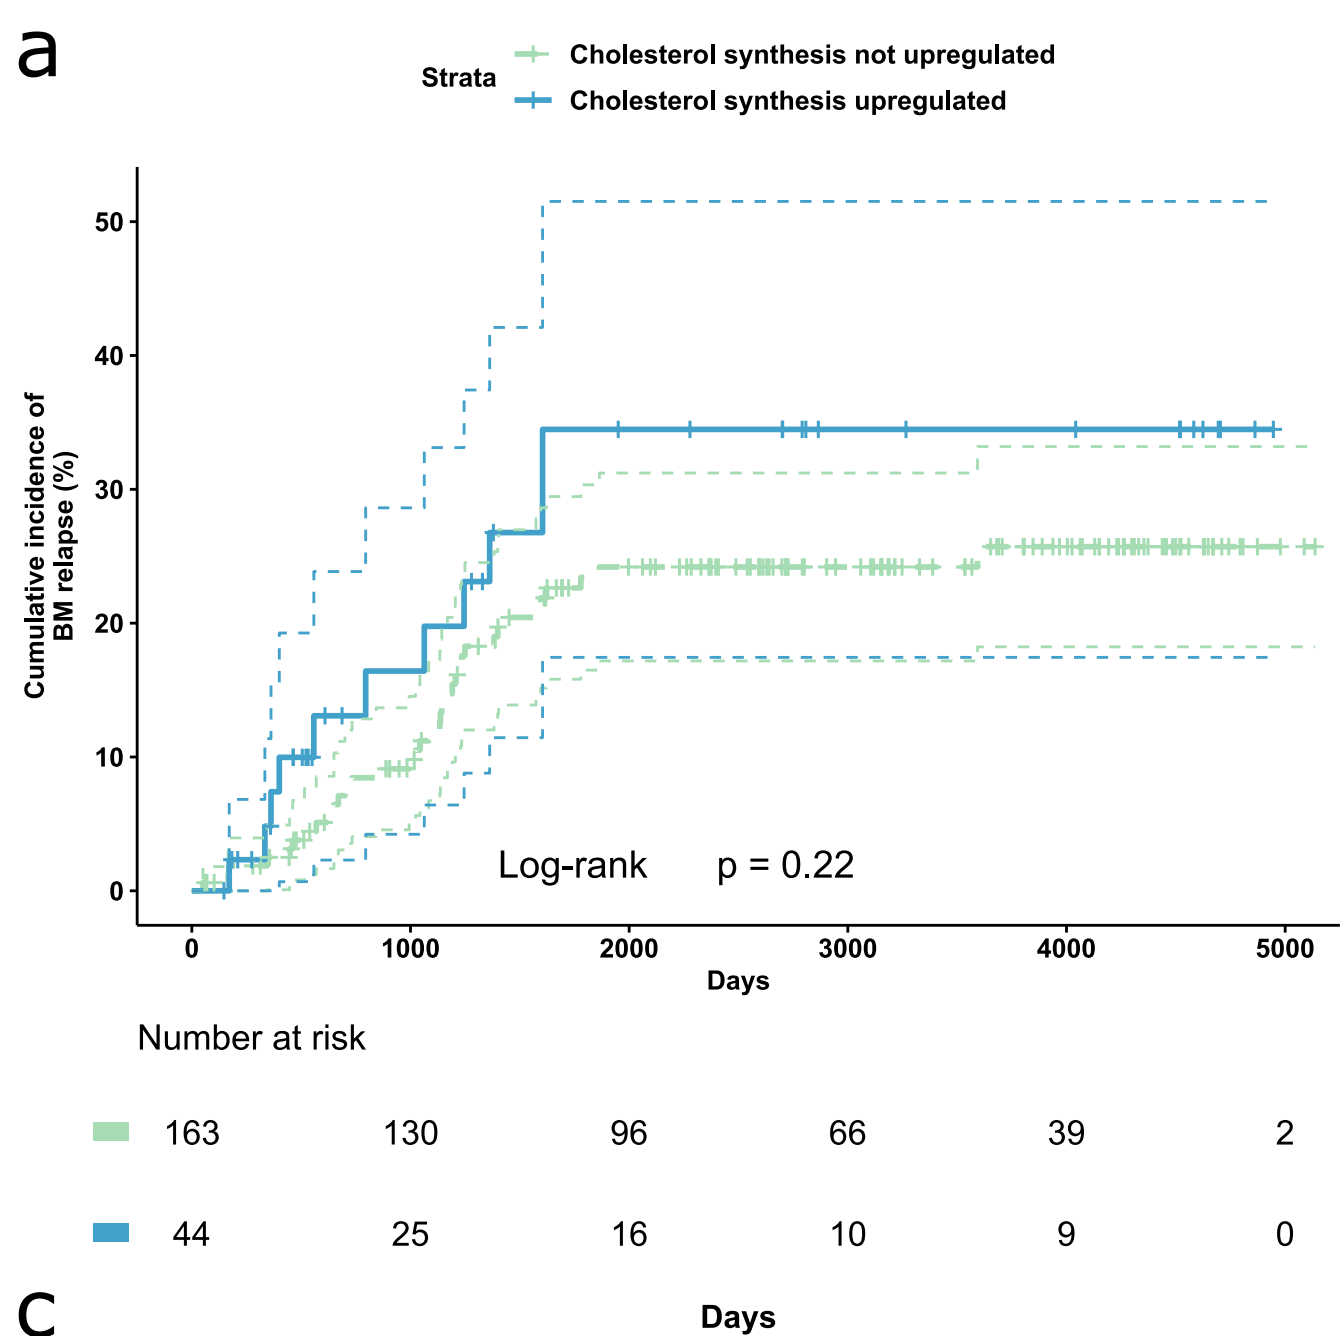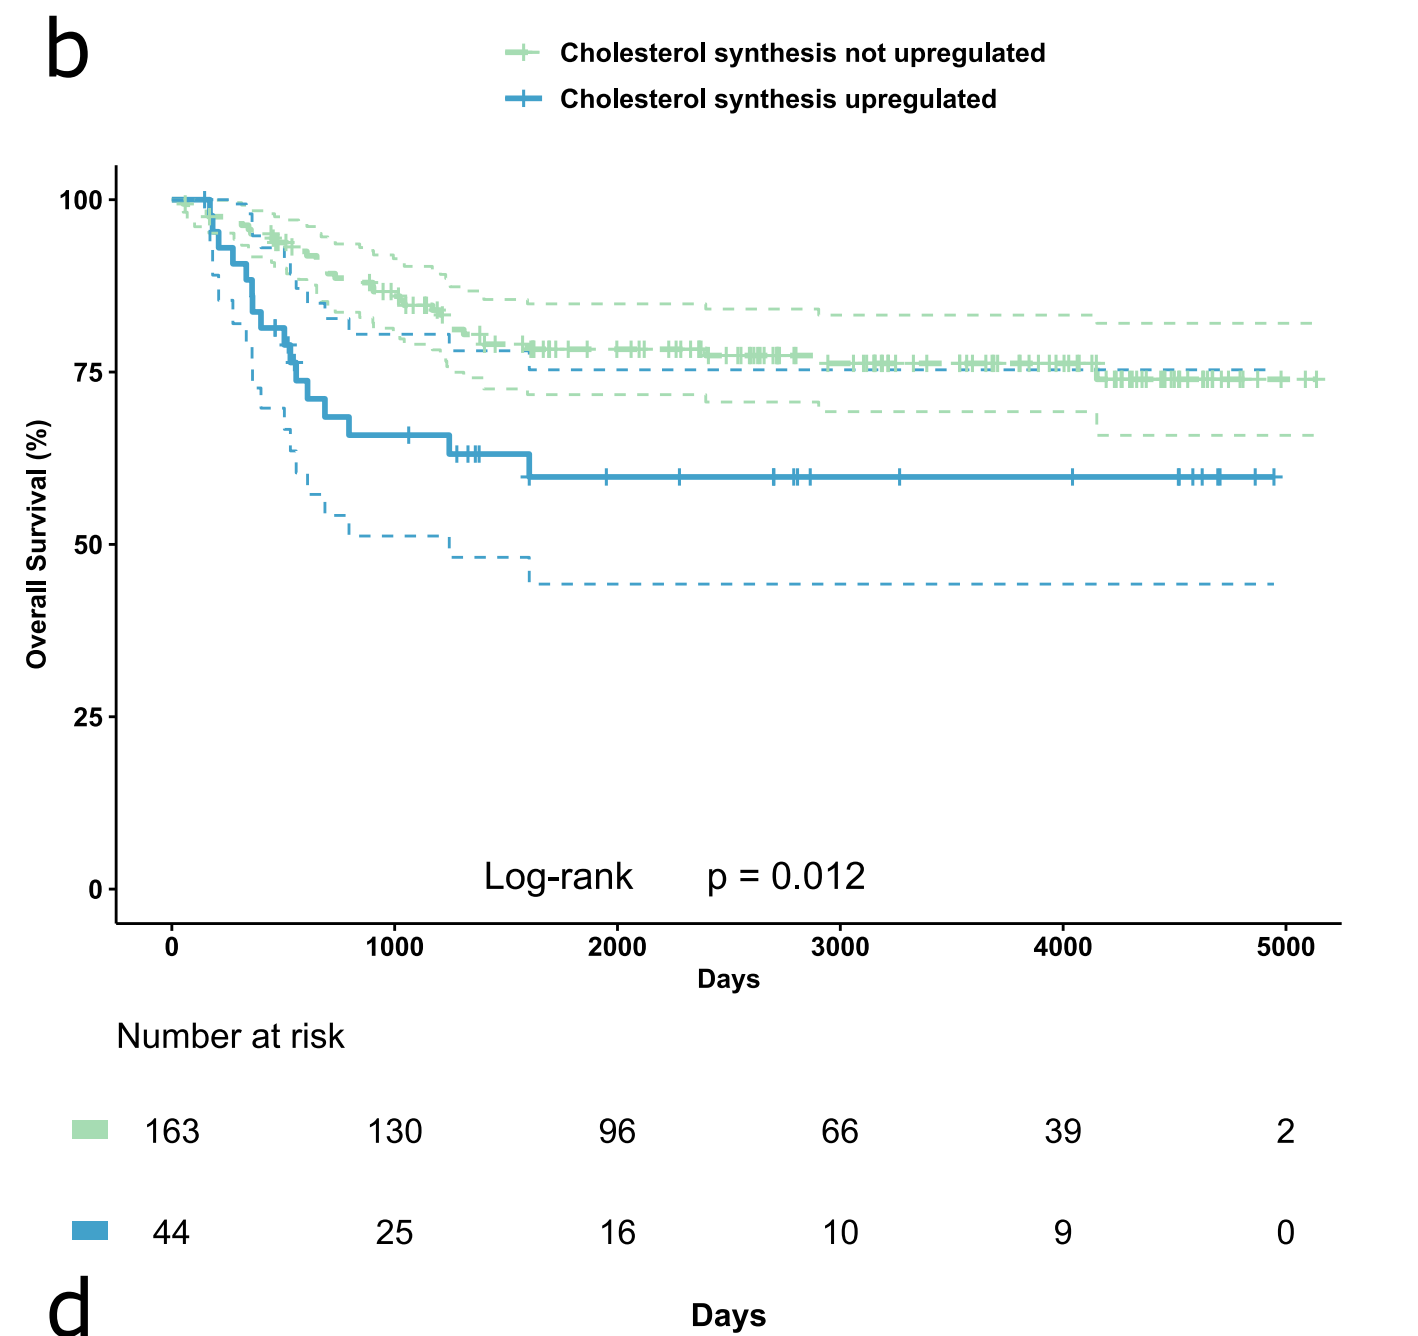

**c**

| Risk Factor                              | HR (95% CI)             | p              |
|------------------------------------------|-------------------------|----------------|
| <b>Cholesterol synthesis upregulated</b> | <b>1.41 (0.69-2.89)</b> | 0.3435         |
| Day 29 MRD >0.01                         | 3.81 (2.03-7.13)        | <b>0.00003</b> |
| High WCC?                                | 1.17 (0.59-2.3)         | 0.65678        |
| CNS status 3                             | 1.08 (0.52-2.26)        | 0.8405         |
| High Age at diagnosis?                   | 0.86 (0.25-2.89)        | 0.80303        |
| MLL Status                               | 0.58 (0.19-1.79)        | 0.34321        |

**d**

| Risk Factor                              | HR (95% CI)             | P              |
|------------------------------------------|-------------------------|----------------|
| <b>Cholesterol synthesis upregulated</b> | <b>1.94 (1.04-3.63)</b> | <b>0.03834</b> |
| Day 29 MRD >0.01                         | 3.11 (1.71-5.67)        | <b>0.00021</b> |
| High WCC?                                | 1.35 (0.71-2.55)        | 0.36427        |
| CNS status 3                             | 1.03 (0.53-2.0)         | 0.93825        |
| High Age at diagnosis?                   | 1.06 (0.37-3.07)        | 0.91603        |
| MLL Status                               | 0.73 (0.28-1.88)        | 0.50911        |

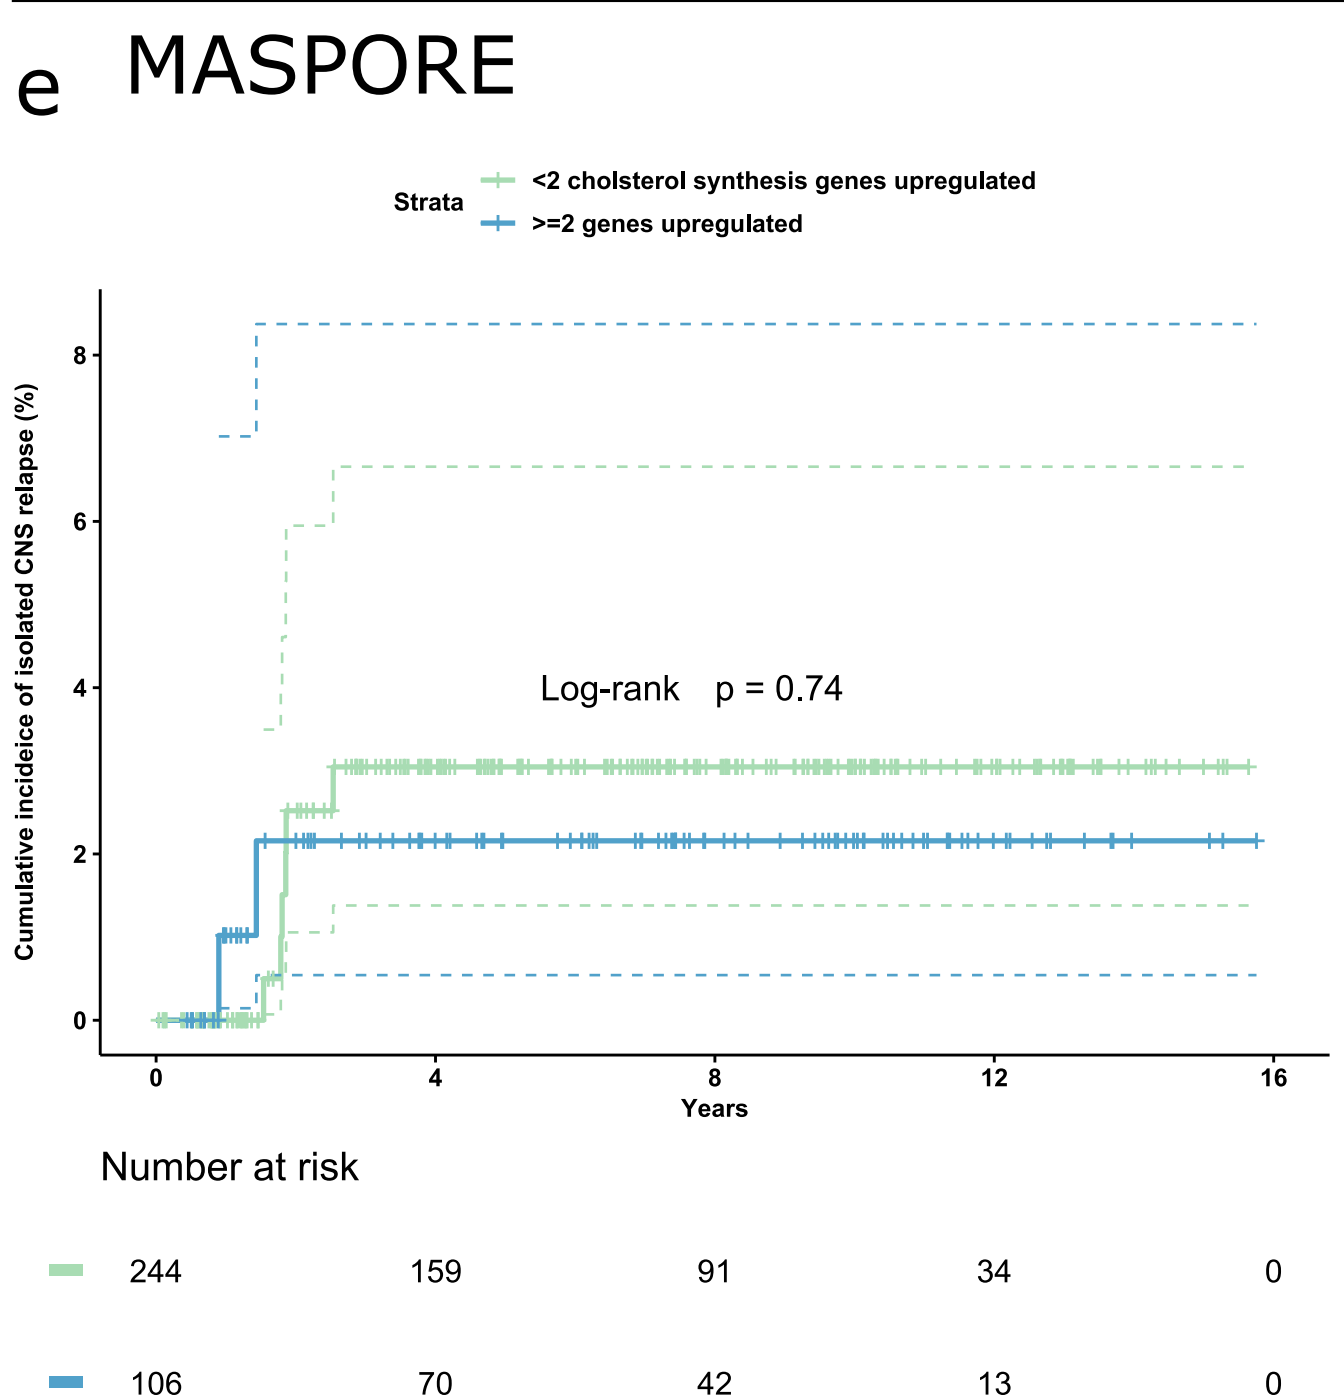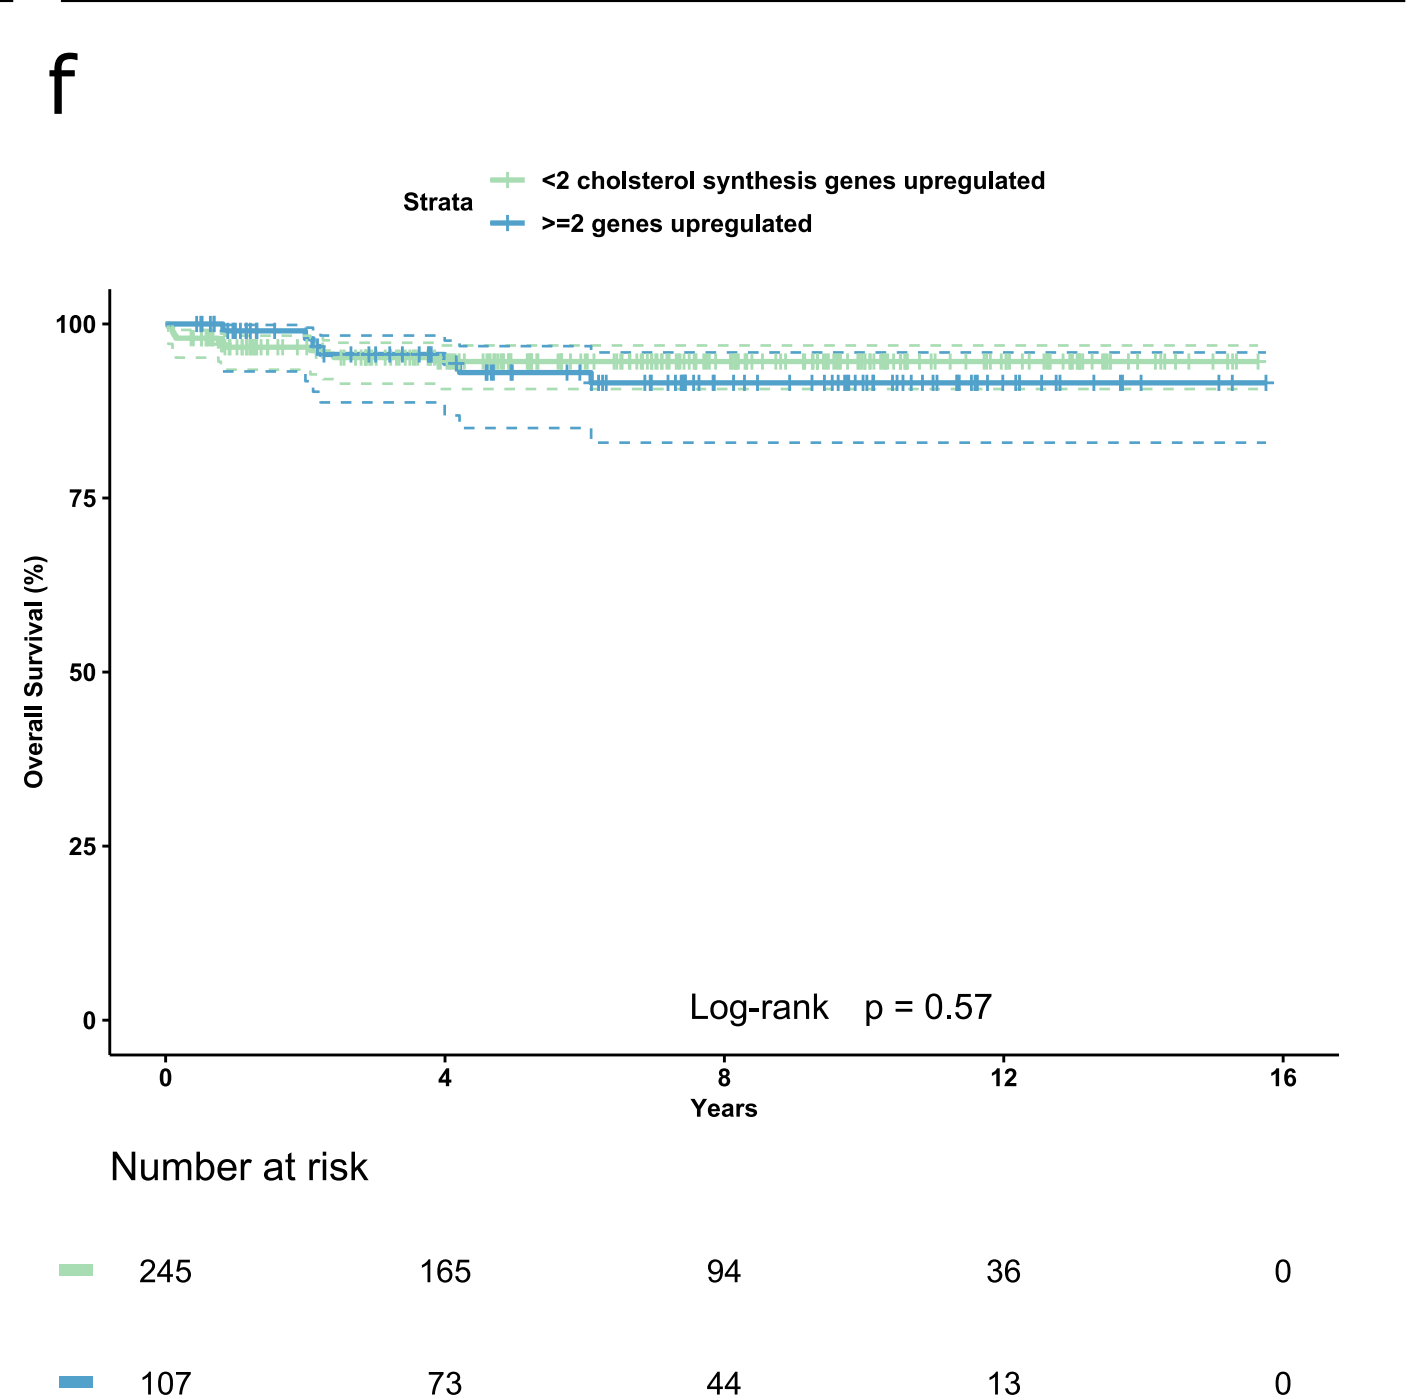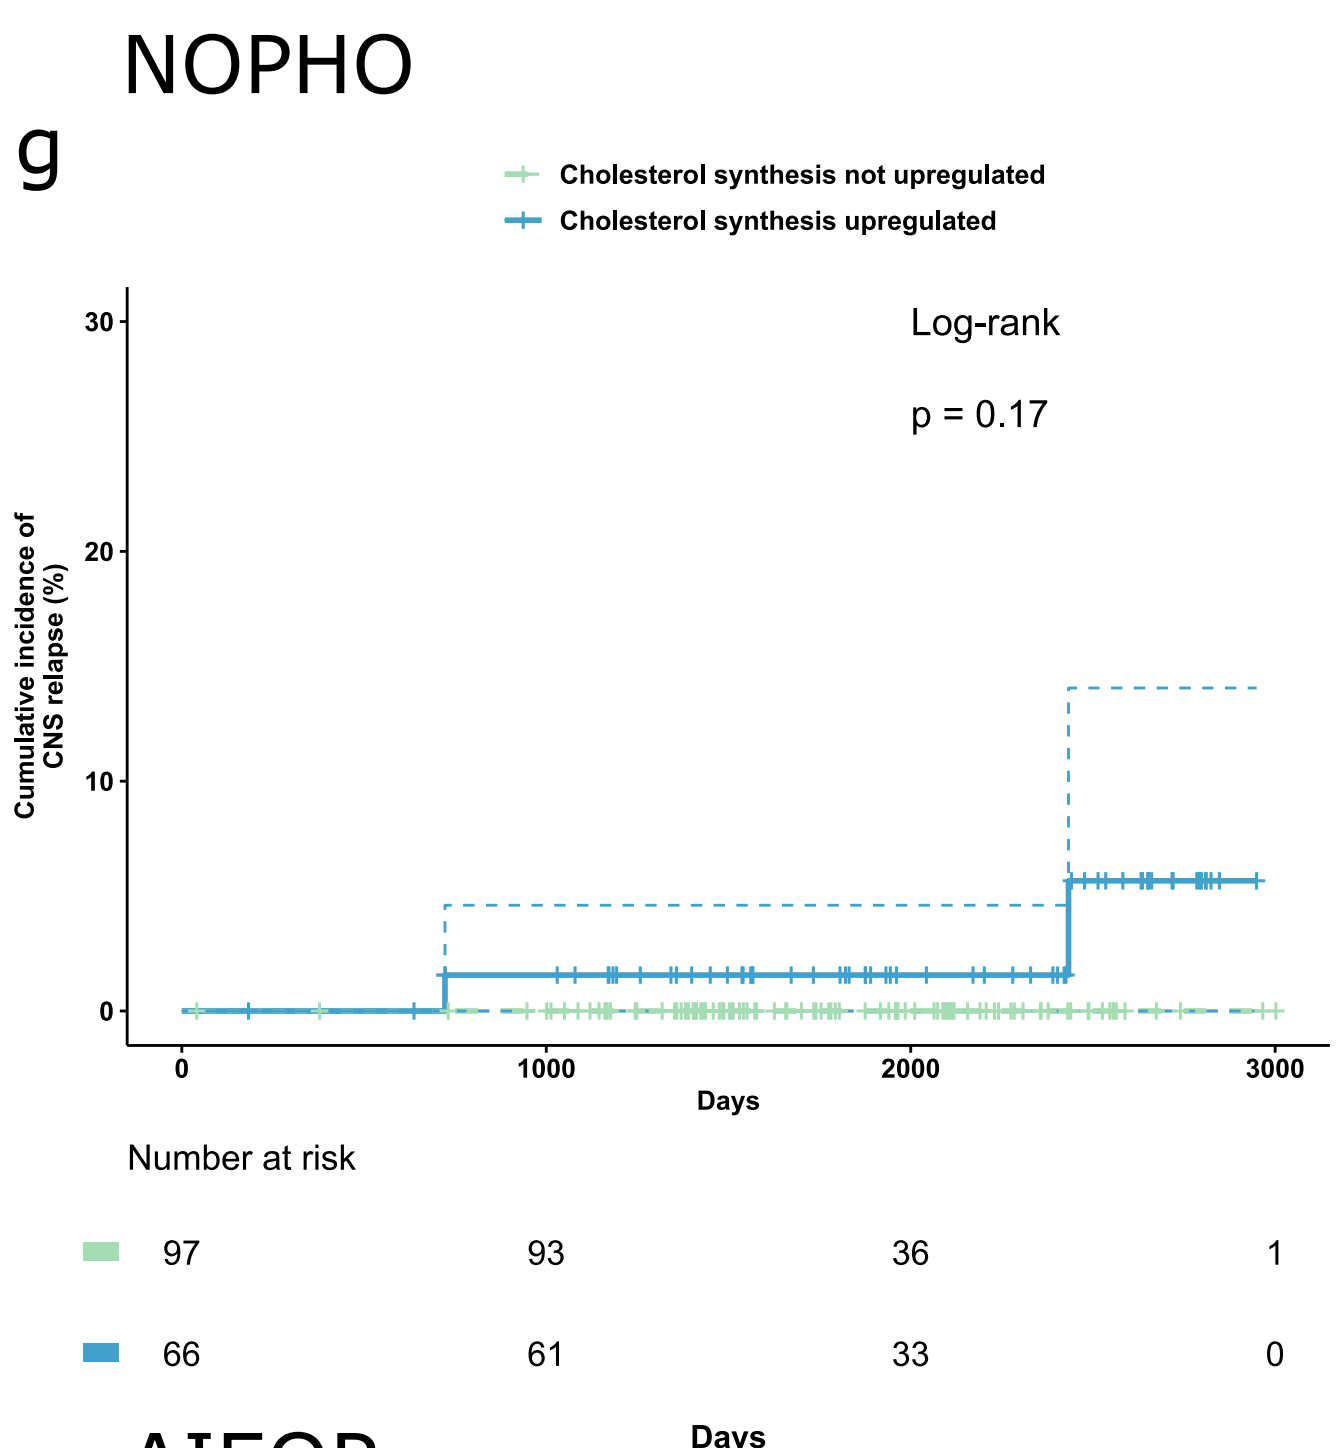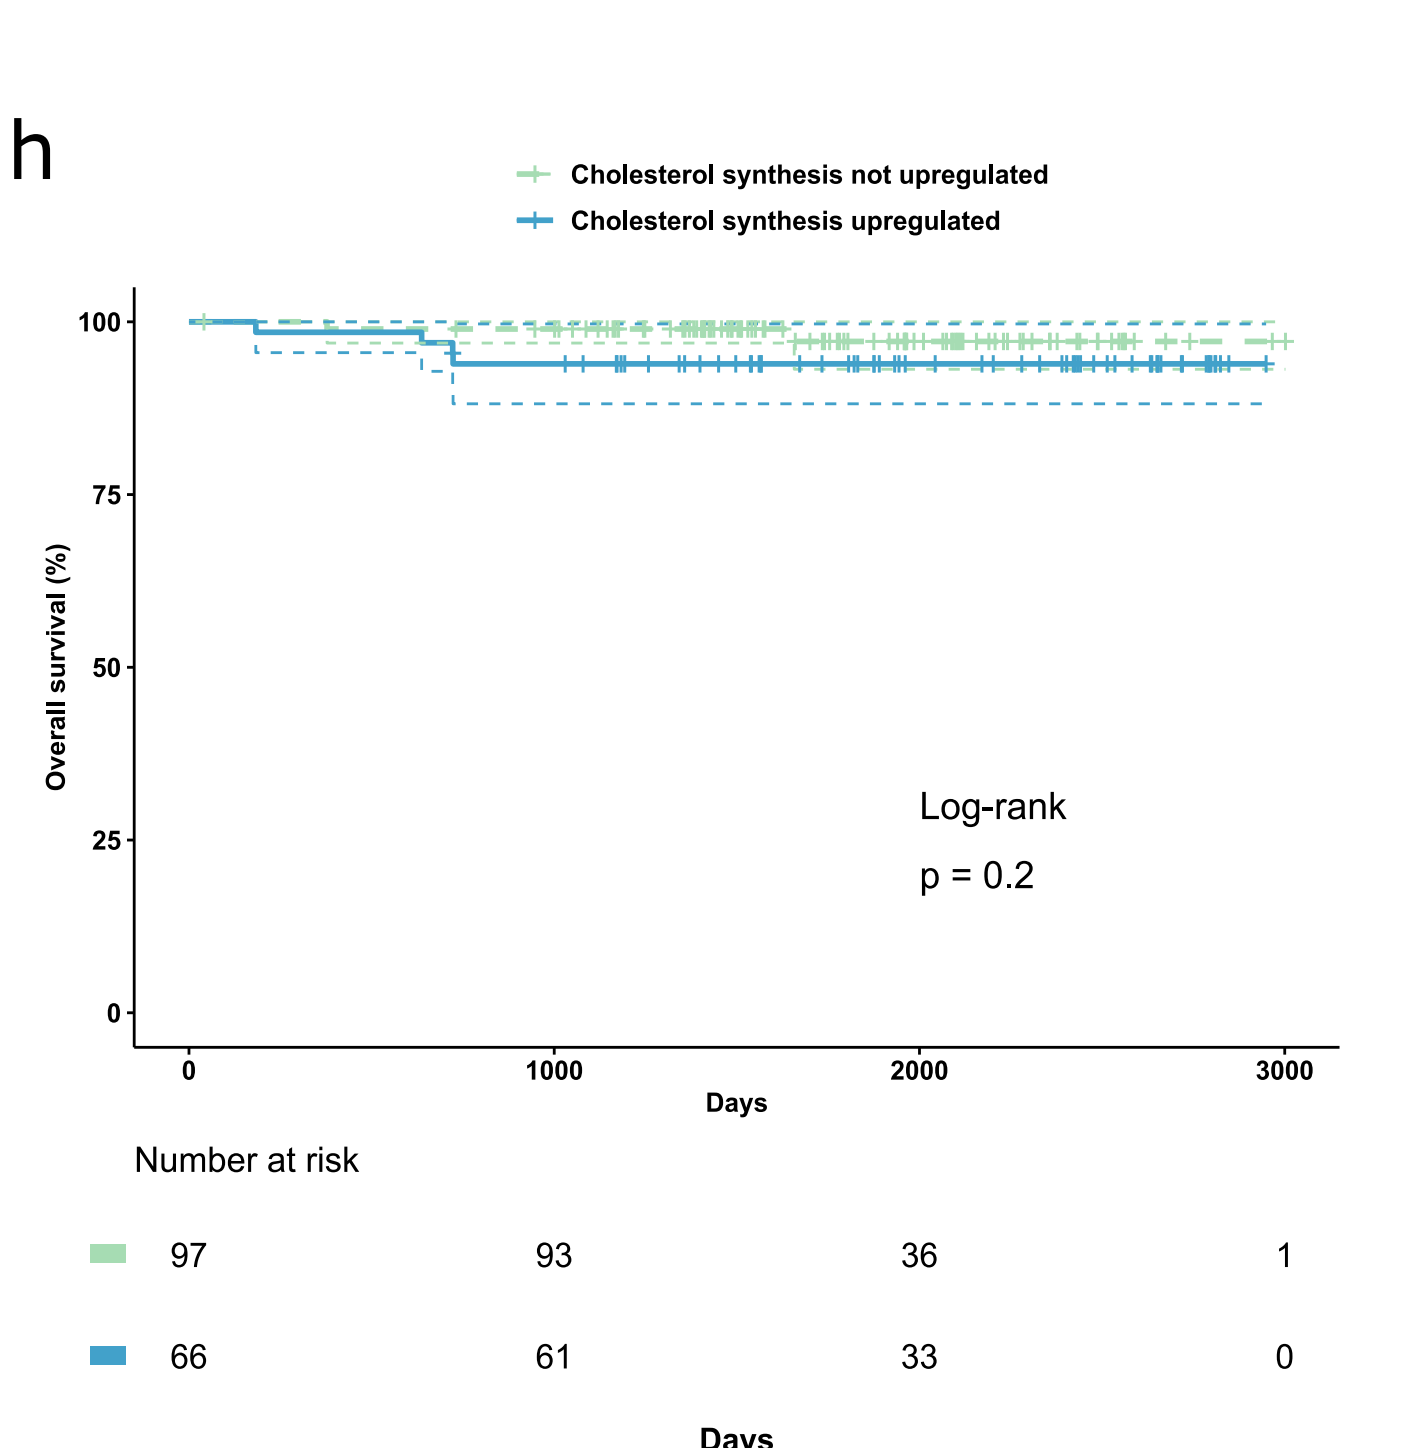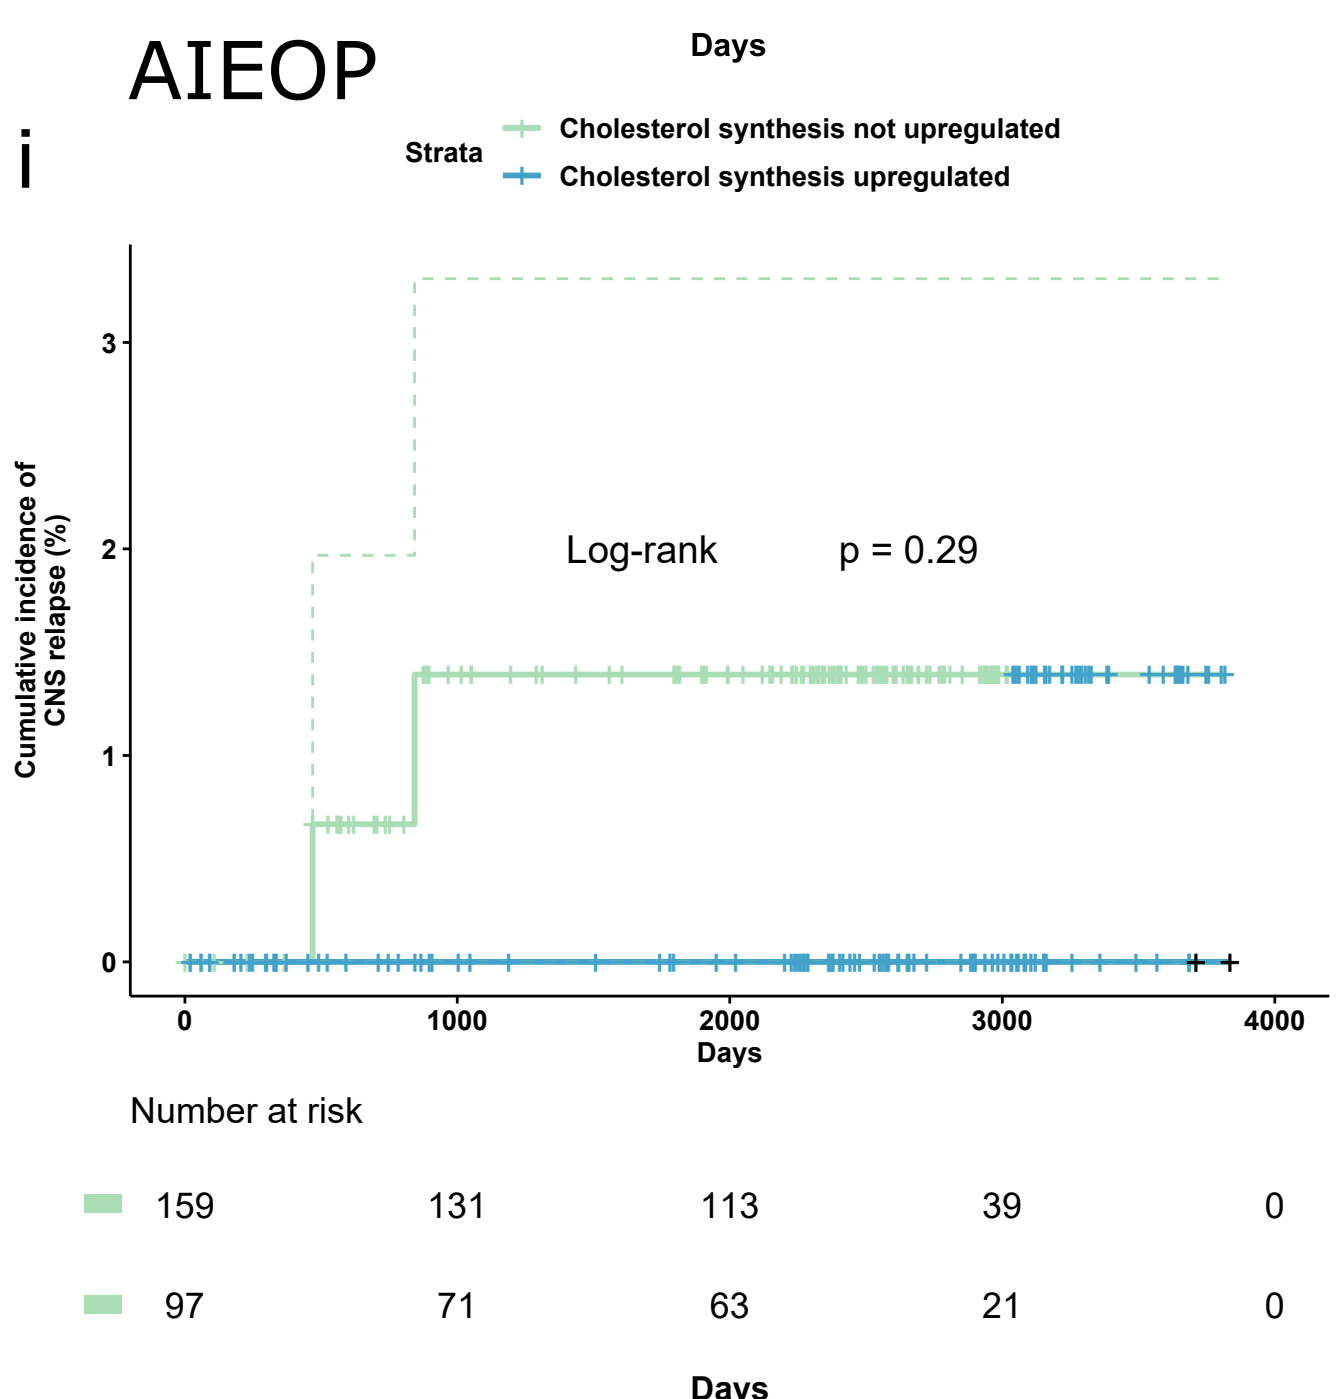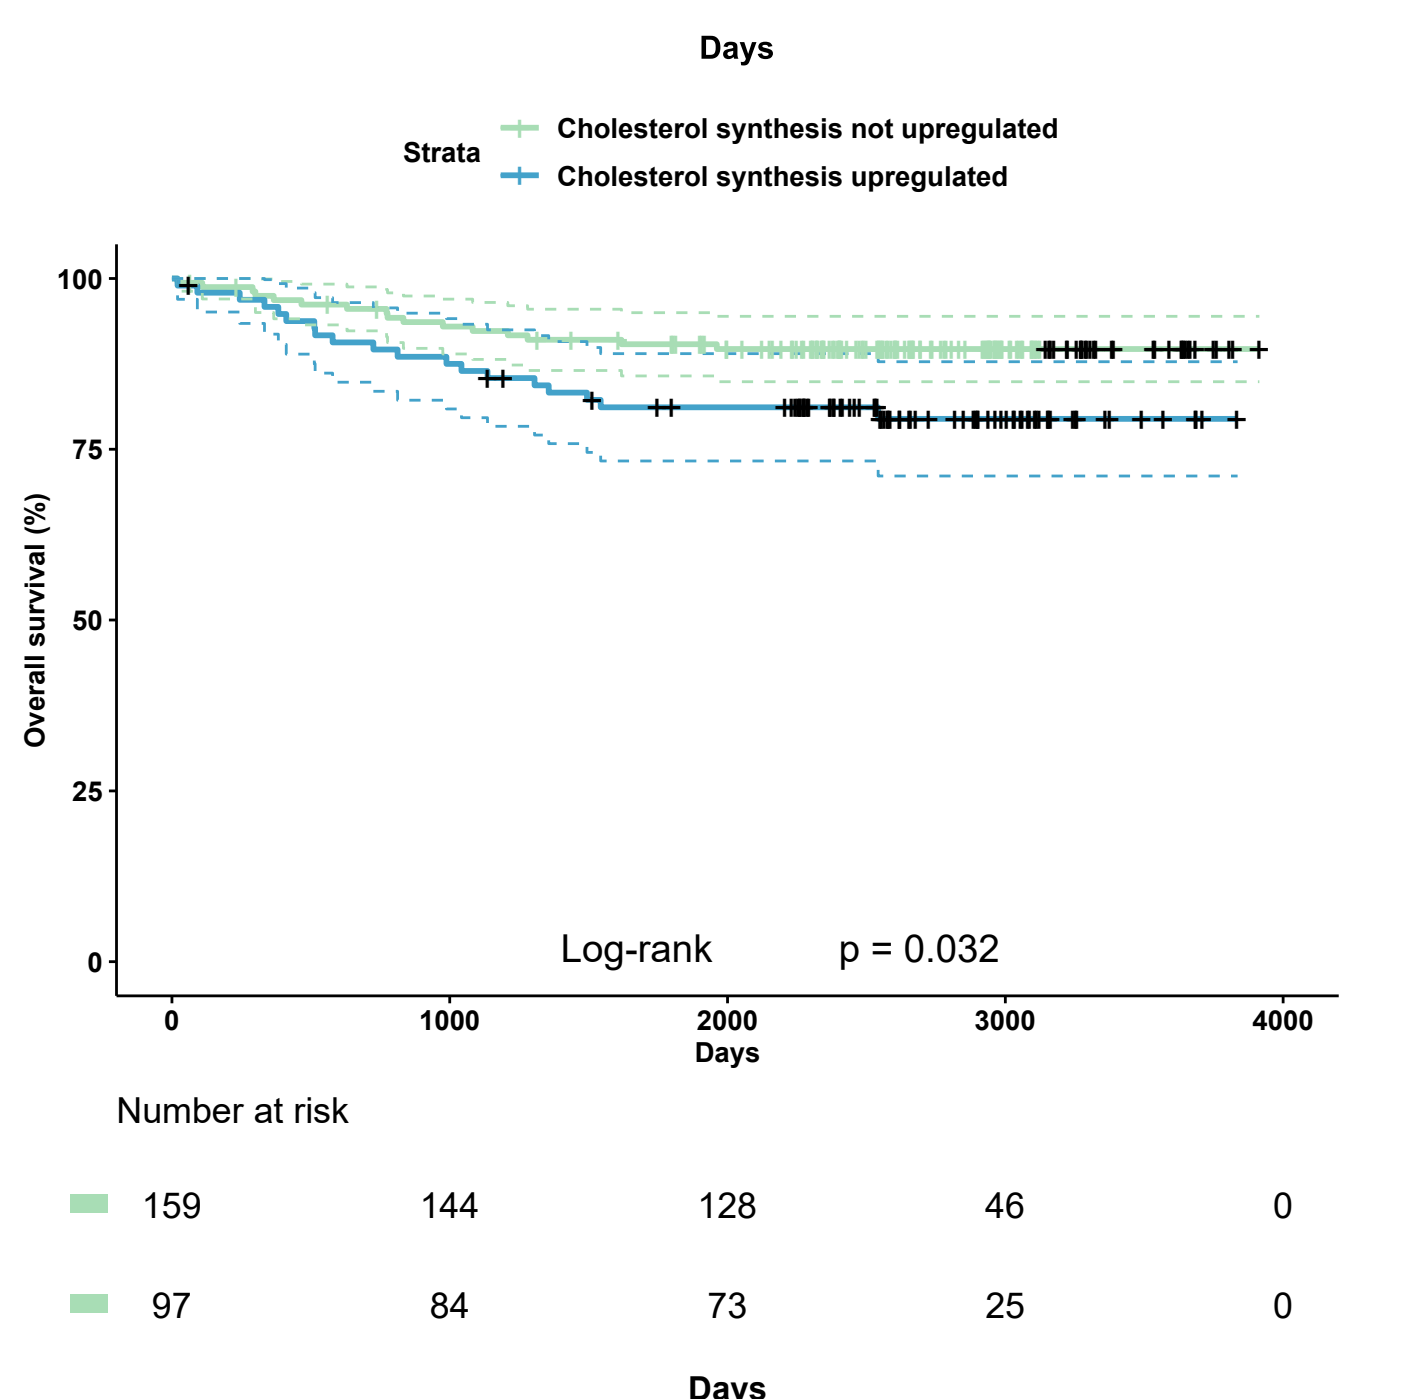

Supplement: 41375_2022_1722_MOESM3_ESM.pdf [file 41375_2022_1722_MOESM3_ESM.pdf]
