# Supplementary material for: Central nervous system involvement in childhood acute lymphoblastic leukemia is linked to upregulation of cholesterol biosynthetic pathways
Source: PubMed Central journal article supplement (PMC9712090; doi:10.1038/s41375-022-01722-x), 2022-10-26

**a** Total Cholesterol Abundance in CSF in Children With ALL at Diagnosis vs. on Maintenance Chemotherapy vs. Normal Controls

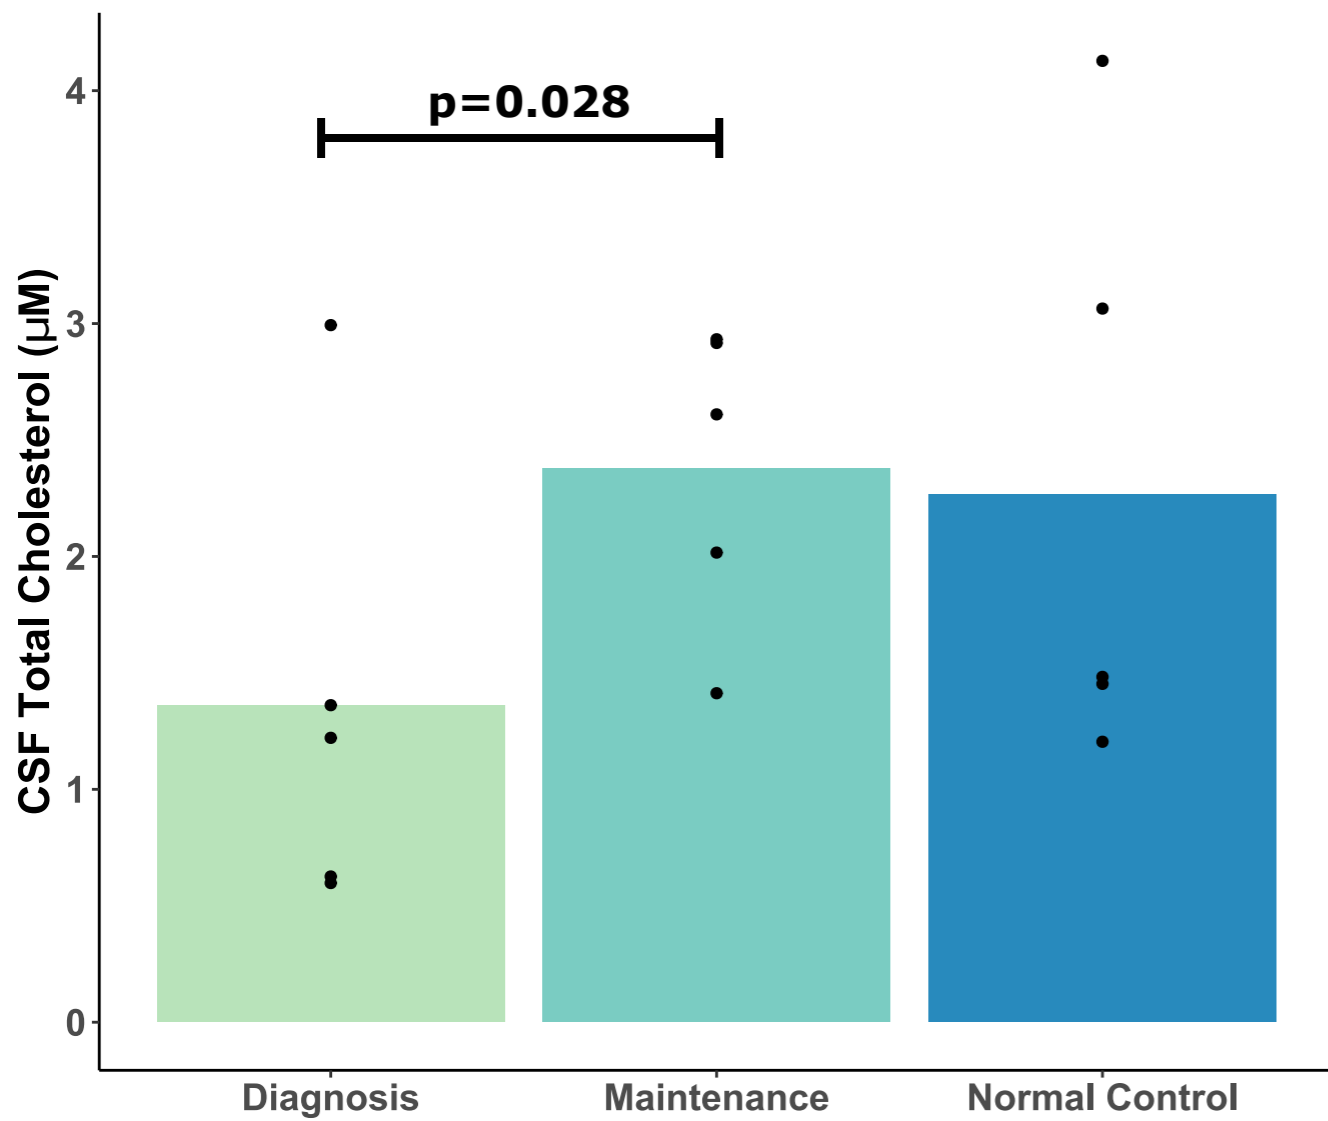

**b** Viability of SEM cells *in-vitro* in reduced-serum culture with Simvastatin treatment +/- mevalonate rescue

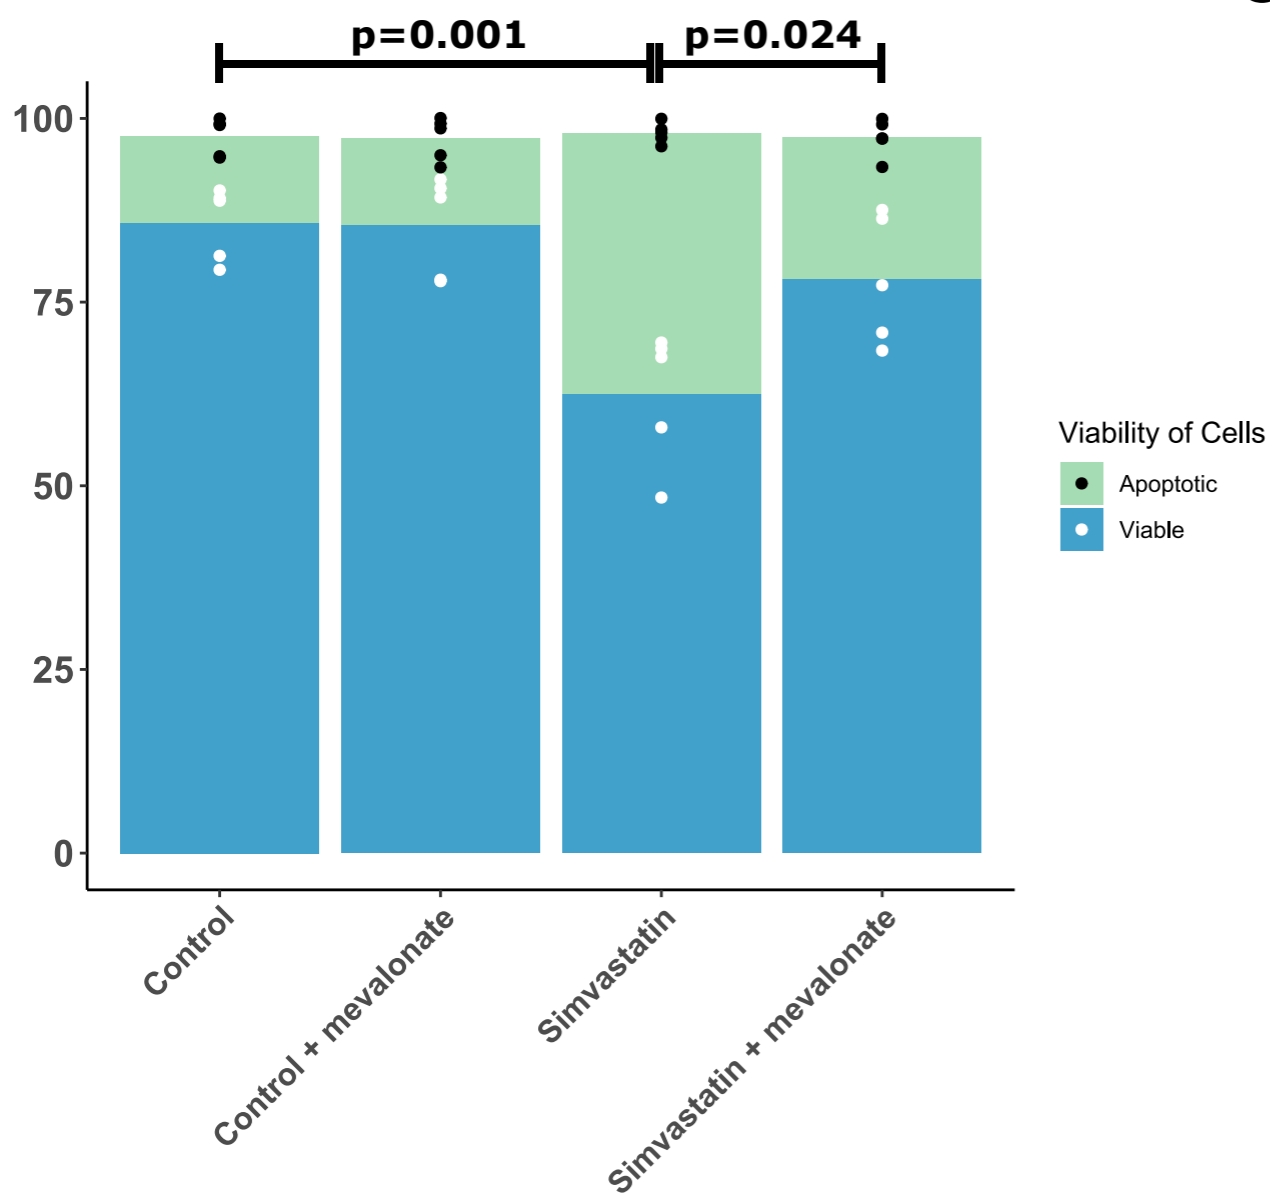

**c** Viability of SEM cells *in-vitro* in reduced-serum culture with Simvastatin treatment +/- cholesterol rescue

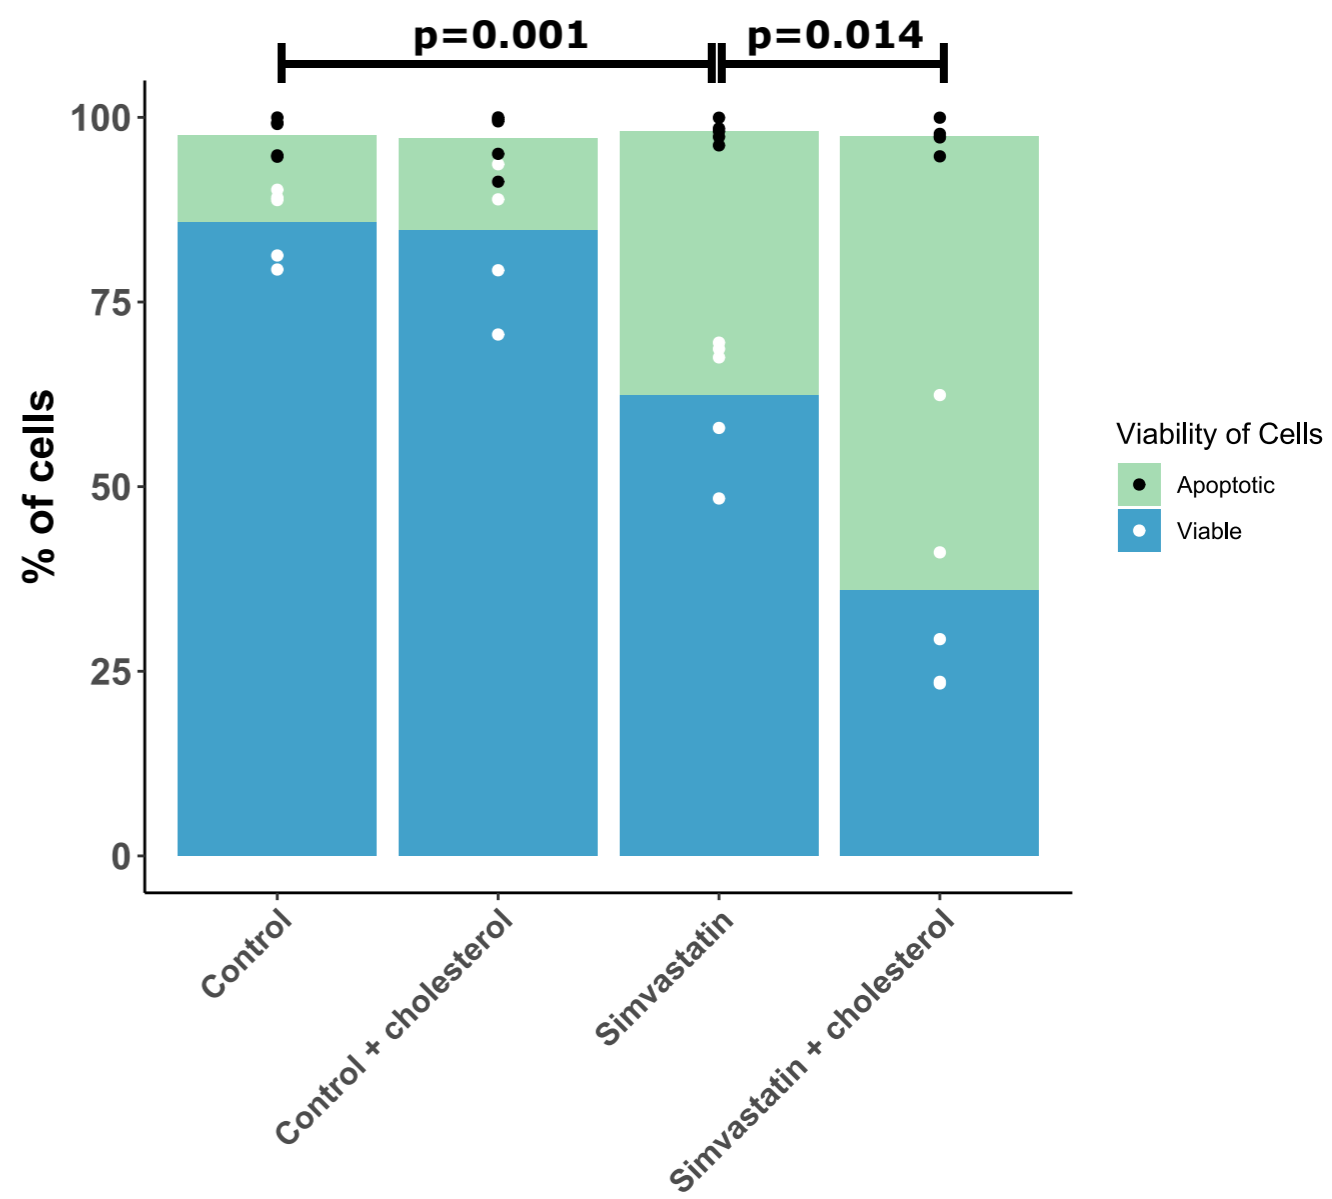

**d** Area of leptomeningeal infiltration of SEM cells *in-vivo* in mice treated with Simvastatin

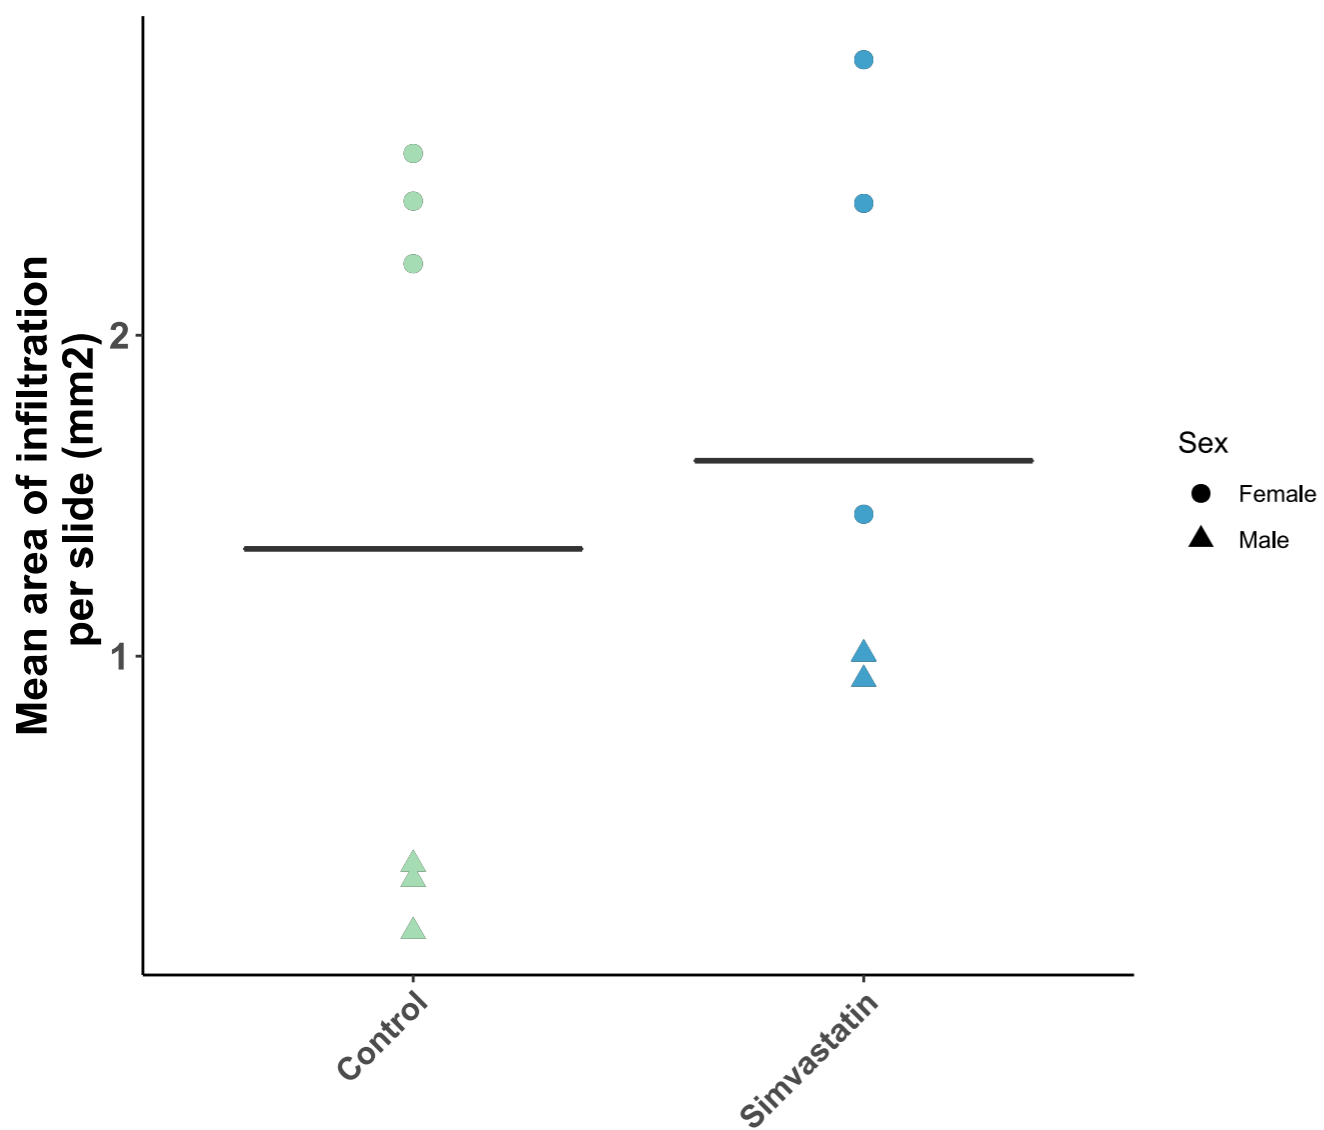

**e**

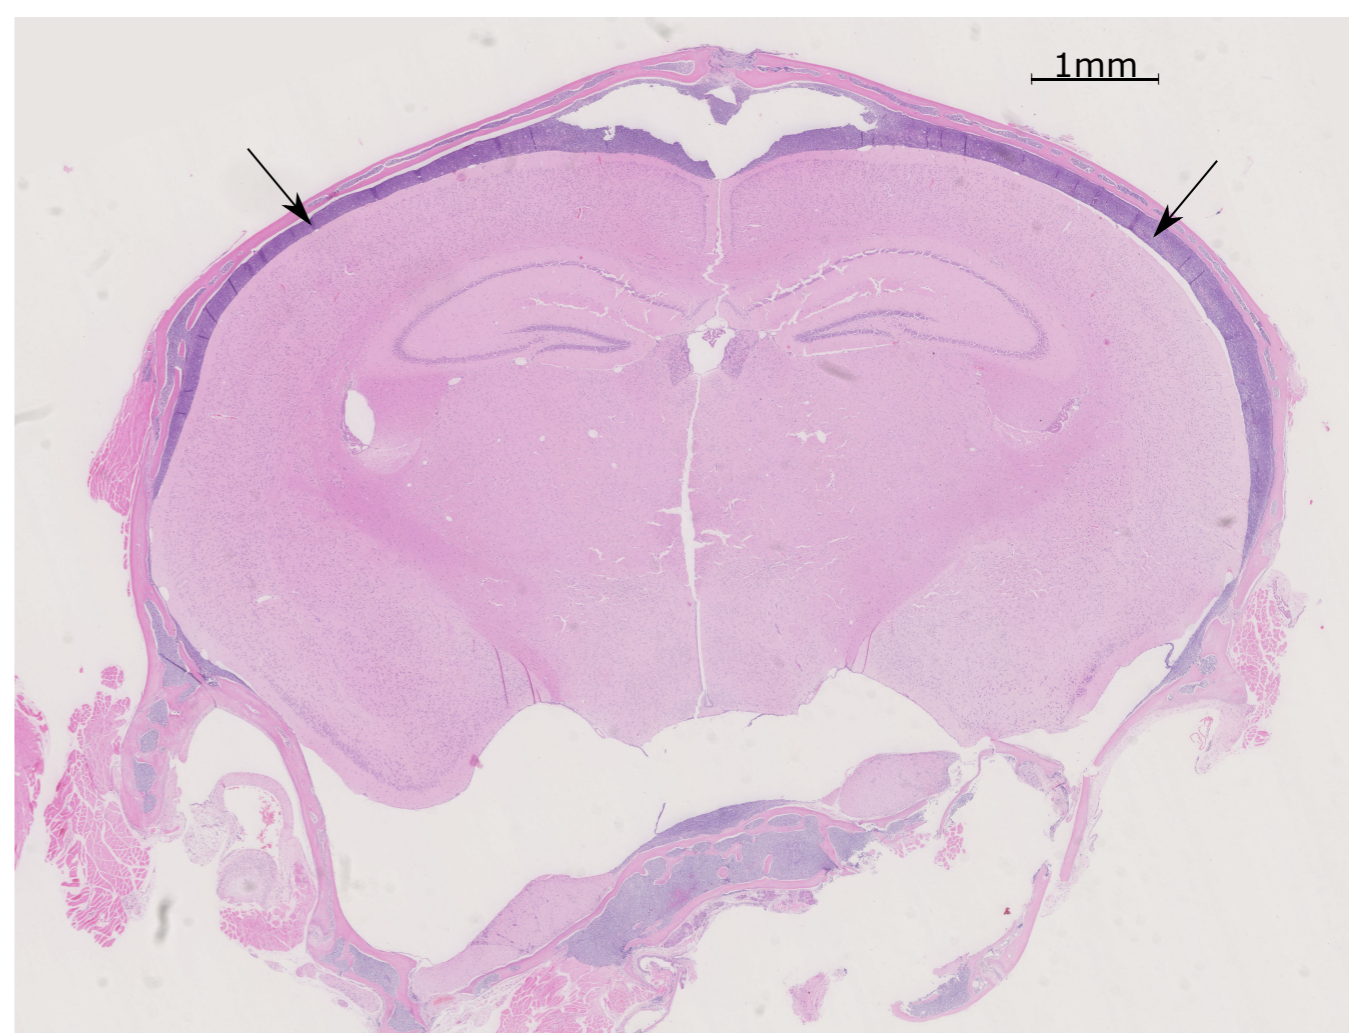

Supplement: 41375_2022_1722_MOESM2_ESM.pdf [file 41375_2022_1722_MOESM2_ESM.pdf]
