# Supplementary material for: Central nervous system involvement in childhood acute lymphoblastic leukemia is linked to upregulation of cholesterol biosynthetic pathways
Source: PubMed Central journal article supplement (PMC9712090; doi:10.1038/s41375-022-01722-x), 2022-10-26

# Bone Marrow

# Leptomeninges

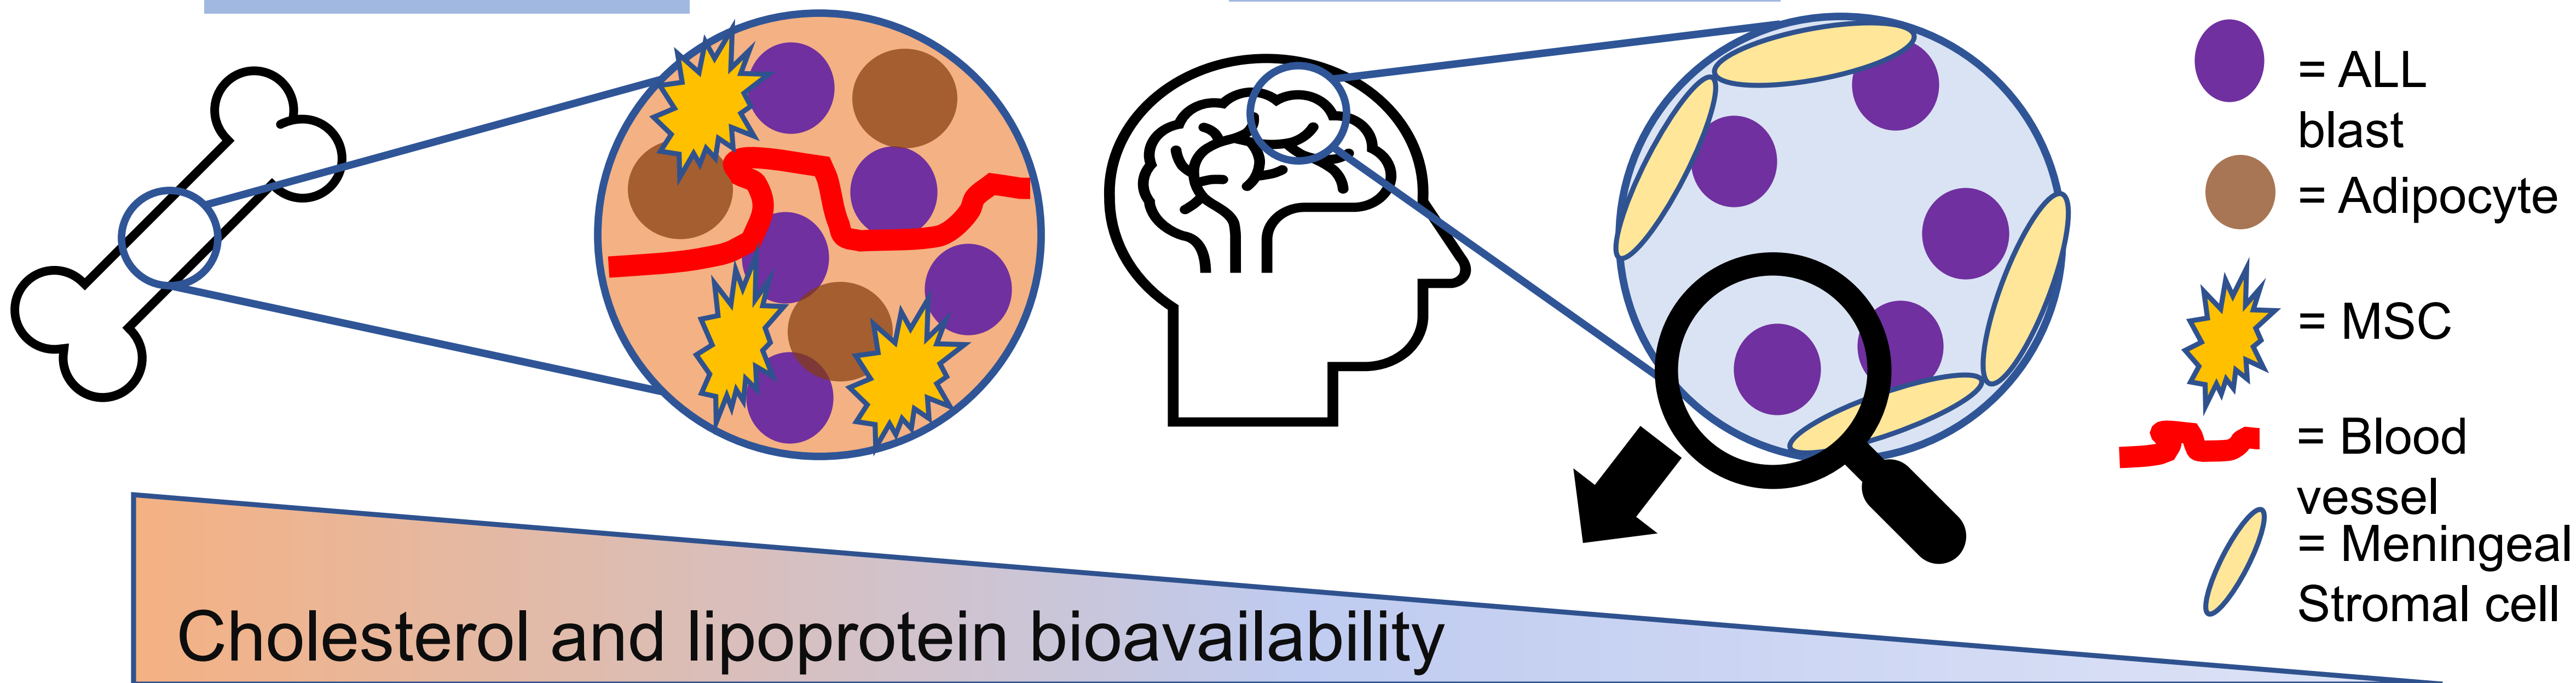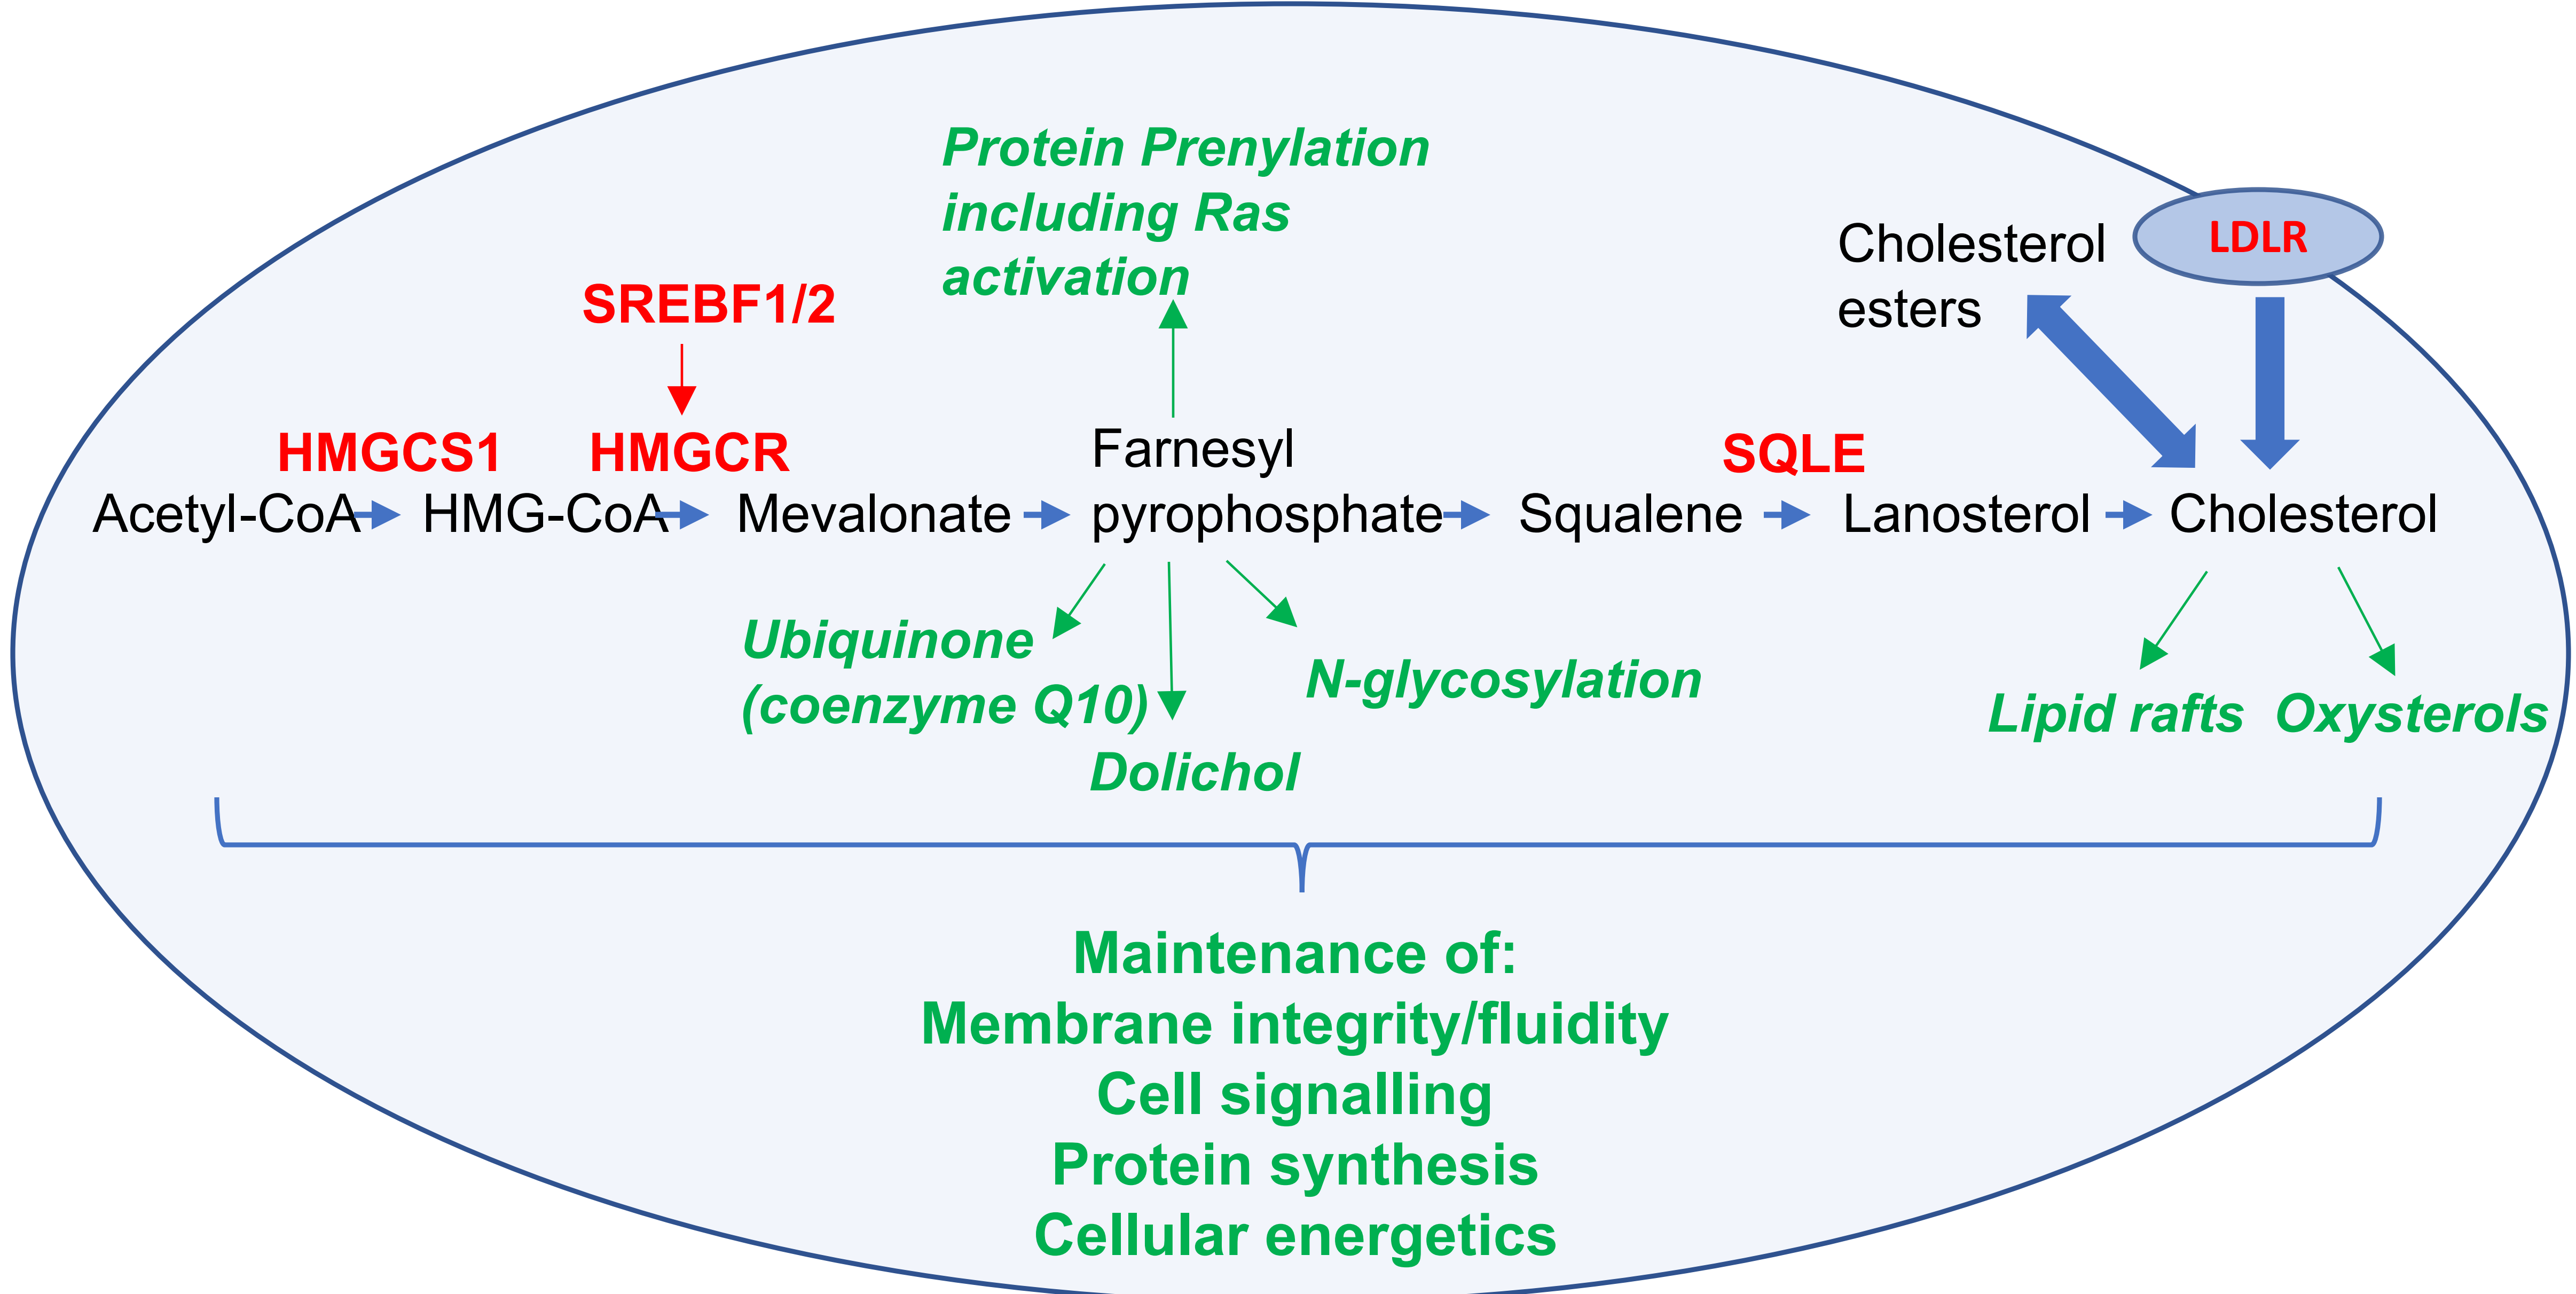

Supplement: 41375_2022_1722_MOESM4_ESM.pdf [file 41375_2022_1722_MOESM4_ESM.pdf]
